# Supplementary material for: Pt supported on long-rod β-FeOOH as an efficient catalyst for HCHO oxidation at ambient temperature
Source: Royal Society of Chemistry journal article supplement (doi:10.1039/c9cy00521h), 2019-01-01
Supplement: c9cy00521h1.pdf [file c9cy00521h1.pdf]

## *Supporting Information*

### **Pt supported on long rod $\beta$ -FeOOH as an efficient catalyst for HCHO oxidation at ambient temperature<sup>†</sup>**

Jiashu Chen <sup>a, b, 1</sup>, Junjie Ding <sup>a, 1</sup>, Hongqi Li <sup>b</sup>, Jinfang Sun <sup>c</sup>, Zebao Rui <sup>d\*</sup>, Hongbing Ji <sup>a, b\*</sup>

<sup>a</sup> *Fine Chemical Research Institute, School of Chemistry, Sun Yat-sen University, Guangzhou 510275, P.R. China*

<sup>b</sup> *R&D Center of Waste-gas Cleaning & Control, Huizhou Research Institute of Sun Yat-Sen University, Huizhou 516081, P.R. China*

<sup>c</sup> *Jiangsu Key Laboratory of Vehicle Emissions Control, Center of Modern Analysis, Nanjing University, Nanjing 210093, P. R. China*

<sup>d</sup> *School of Chemical Engineering and Technology, Sun Yat-sen University, Zhuhai 519082, P.R. China*

---

\* Corresponding authors.

<sup>1</sup> Equal contribution to authorship.

E-mail addresses: [ruizebao@mail.sysu.edu.cn](mailto:ruizebao@mail.sysu.edu.cn) (Z. B. Rui); [jihb@mail.sysu.edu.cn](mailto:jihb@mail.sysu.edu.cn) (H. B. Ji)

## **Table of contents**

### **1. Experimental details of phenol spectrophotometric method**

### **2. Figure captions**

Fig S1 N<sub>2</sub> adsorption-desorption isotherms for the synthesized Pt/FeOOH samples.

Fig S2 Pt particle size distributions for the (a) Pt/FeOOH-P, (b) Pt/FeOOH-SR and (a) Pt/FeOOH-LR.

Fig. S3 HCHO conversions over Pt/FeOOH-LR, Pt/FeOx and Pt/Fe<sub>2</sub>O<sub>3</sub>-c at various temperatures.

Fig. S4 HCHO conversions as a function of temperature at various GHSVs over Pt/FeOOH-LR.

Fig S5 HCHO oxidation activity as a function of temperature under 50 % and < 5% R.H. over Pt/FeOOH-LR

Fig. S6 Intensity of the bands at 1570 cm<sup>-1</sup> vs. time under O<sub>2</sub> + HCHO + He gas mixture adsorption at 30 °C.

## 1. Experimental details of phenol spectrophotometric method

The phenol spectrophotometric method for analyzing the HCHO concentration in the gaseous mixture was performed as follows: The gas stream containing trace HCHO was bubbled through 5 mL phenol reagent ( $\text{C}_6\text{H}_4\text{SN}(\text{CH}_3)\text{C}/\text{NNH}_2\cdot\text{HCl}$ , Alfa Aesar) solution ( $1\times 10^{-4}$  wt %) for 30 s to collect HCHO by absorption. Then, 0.4 mL (1 wt %) ammonium ferric sulfate ( $\text{NH}_4\text{Fe}(\text{SO}_4)_2\cdot 12\text{H}_2\text{O}$ , Tianjin Fuchen Chemical Reagent Company) solution was added as the coloring reagent. After being shaken for 5 s and staying for 15 min in the dark, HCHO concentration in the gas stream was then determined by measuring light absorbance at 630 nm with a spectrophotometer (UV-240, Shimadzu Co. Ltd., Japan).

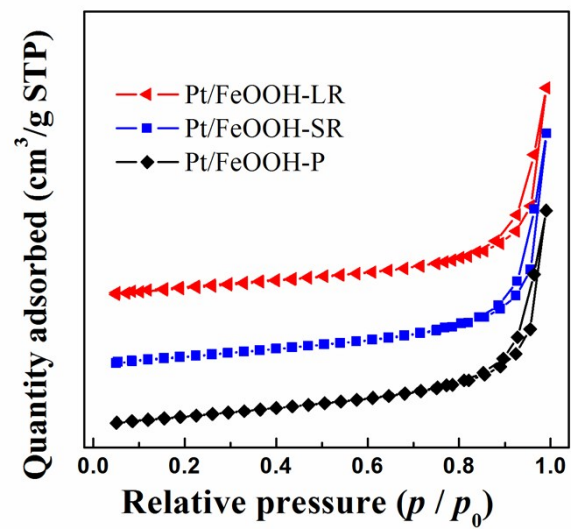

Fig S1 N<sub>2</sub> adsorption-desorption isotherms for the synthesized Pt/FeOOH samples.

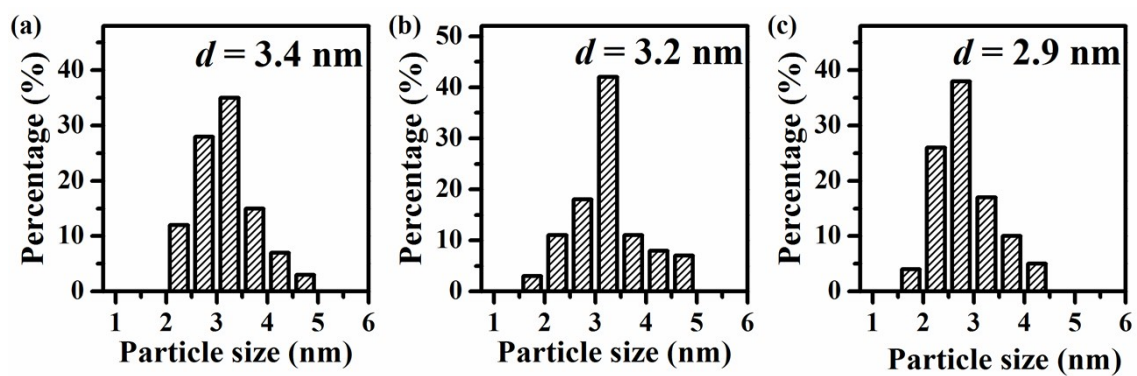

Fig S2 Pt particle size distributions for the (a) Pt/FeOOH-P, (b) Pt/FeOOH-SR and (a) Pt/FeOOH-LR.

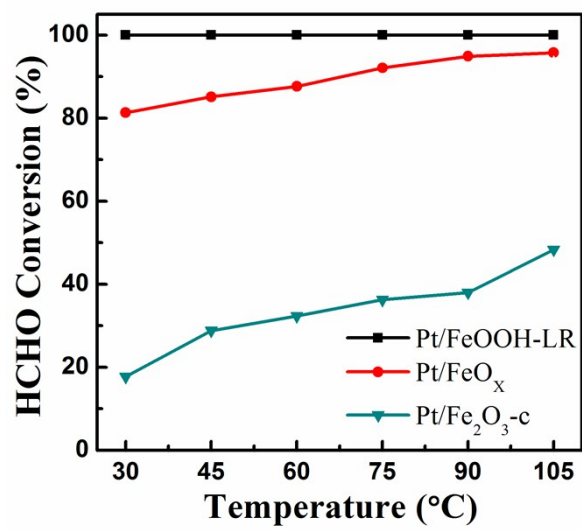

Fig. S3 HCHO conversion over Pt/FeOOH-LR, Pt/FeO<sub>x</sub> and Pt/Fe<sub>2</sub>O<sub>3</sub>-c under various temperatures.

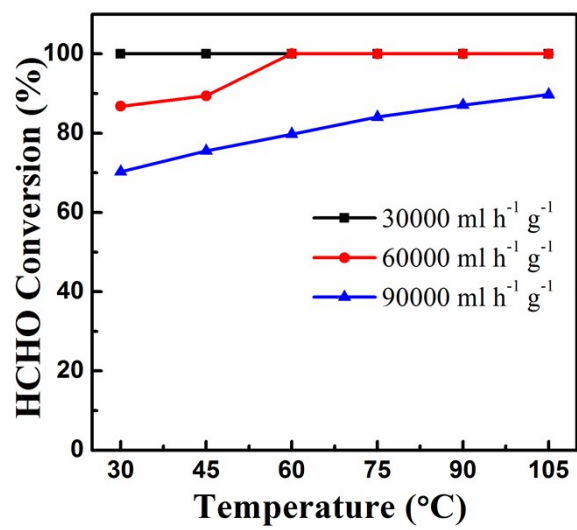

Fig. S4 HCHO conversions as a function of temperature at various GHSVs over Pt/FeOOH-LR.

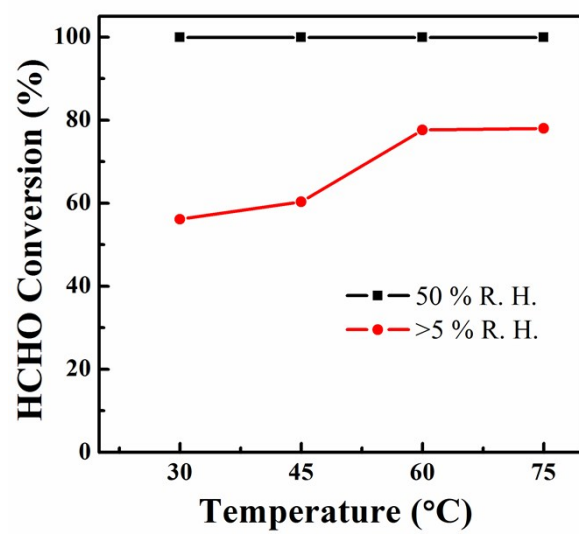

Fig S5 HCHO oxidation activity as a function of temperature under 50 % and < 5% R.

H. over Pt/FeOOH-LR

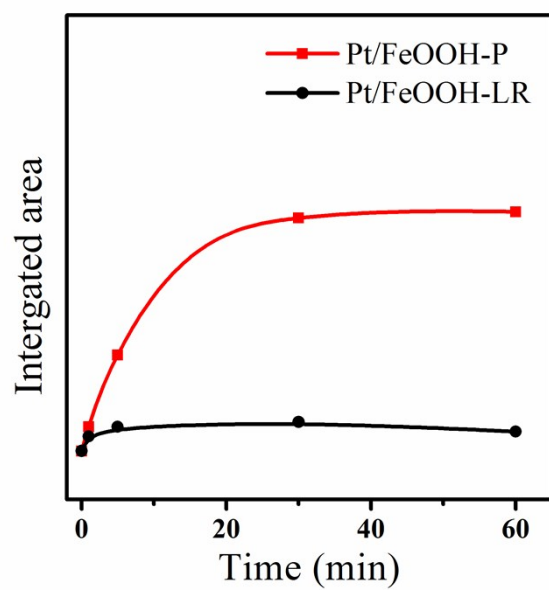

Fig. S6 Intensity of 1570  $\text{cm}^{-1}$  peak vs. time under  $\text{O}_2 + \text{HCHO} + \text{He}$  gas mixture adsorption at 30  $^{\circ}\text{C}$ .
